# Supplementary material for: Fluorescence-enhanced supra-amphiphiles based on pillar[5]arene: construction, controllable self-assembly and application in cell imaging
Source: Royal Society of Chemistry journal article supplement (doi:10.1039/d4cc01987c), 2024-01-01
Supplement: d4cc01987c1.pdf [file d4cc01987c1.pdf]

# Fluorescence-enhanced supra-amphiphilics based on pillar[5]arene: construction, controllable self-assembly and application in cell-imaging

Lizhen Fang,<sup>a,b</sup> Yu Dai,<sup>b</sup> Yiqiao Bai,<sup>b</sup> Yujia Meng,<sup>b</sup> Wenqiang Yu,<sup>b</sup> Yunhan Gao,<sup>b</sup> Ruowen Tang,<sup>b</sup> Yue Zhang,<sup>b</sup> Liang Li,<sup>\*,a</sup> Jin Wang,<sup>b</sup> Yue Ding,<sup>b</sup> Yang Wang,<sup>b</sup> Tingting Chen,<sup>b</sup> Yan Cai,<sup>b</sup> and Yong Yao<sup>\*,b</sup>

<sup>a</sup>School of Chemical and Environmental Engineering, Shanghai Institute of Technology, Shanghai 201418, China.

<sup>b</sup>School of Chemistry and Chemical Engineering, Nantong University, Nantong, Jiangsu, 226019, P.R. China.

E-mail: lilianglcx@sit.edu.cn; yaoyong1986@ntu.edu.cn.

## Supporting Information (19 pages)

|   |                                                          |     |
|---|----------------------------------------------------------|-----|
| 1 | Materials and methods                                    | S2  |
| 2 | Synthesis of ENDT <sub>n</sub>                           | S4  |
| 3 | Synthesis of WP5                                         | S7  |
| 4 | Host-guest interaction between WP5 and ENDT <sub>n</sub> | S8  |
| 5 | Self-assembly properties                                 | S9  |
| 6 | References                                               | S10 |

## 1. Materials and methods

### Materials

All reagents were commercially available and used as supplied without further purification. Solvents were either employed as purchased or dried according to procedures described in the literature. The cell lines used in the study were purchased from Jiangsu A.K.X. Material Technology Co., Ltd.

### Measurements

**NMR spectroscopy.**  $^1\text{H}$  and  $^{13}\text{C}$  NMR spectra were recorded on a Bruker AV400 spectrometer.

**Fluorescence spectroscopy.** Steady-state fluorescence spectra were recorded in a conventional quartz cell (light path 10 mm) on a Varian Cary Eclipse equipped with a Varian Cary single-cell peltier accessory to control temperature.

**UV/Vis spectroscopy.** UV/Vis spectra and the optical transmittance were recorded in a quartz cell (light path 10 mm) on a Shimadzu UV-3600 spectrophotometer equipped with a PTC-348WI temperature controller.

**ESI-MS spectroscopy.** Electrospray ionization mass spectra (ESI-MS) were measured by Agilent 6520 Q-TOF-MS.

**Cytotoxicity experiments.** HeLa cells were incubated in Dulbecco's modified Eagle's medium (DMEM). The medium was supplemented with 10% fetal bovine serum and 1% Penicillin-Streptomycin. Cells were seeded in 96-well plates ( $5 \times 10^4$  cell  $\text{mL}^{-1}$ , 0.1 mL per well) for 4 h at 37°C in 5%  $\text{CO}_2$ . Then the cells were incubated with different groups for 4 h. The relative cellular viability was determined by the MTT assay.

**Confocal laser scanning microscopy.** Cells were seeded in 6-well plates ( $5 \times 10^4$  cell  $\text{mL}^{-1}$ , 2 mL per well) for 24 h at 37°C in 5%  $\text{CO}_2$ . The cells were incubated with the corresponding solution for 4 h. Then the medium was removed, and the cells were

washed with phosphate buffer solution for three time. Finally, the cells were subjected to observation by a confocal laser scanning microscope.

**TEM microscopy.** High-resolution Transmission electron microscopy (TEM) images were acquired using a Tecnai 20 high-resolution transmission electron microscope operating at an accelerating voltage of 200 keV. The sample for high-resolution TEM measurements was prepared by dropping the solution onto a copper grid. The grid was then air-dried.

**SEM microscopy.** Scanning electron microscopy (SEM) investigations were carried out on a HitachiS-3400 SEM instrument.

**DLS spectroscopy.** Solution samples were examined on a laser light scattering spectrometer (BI-200SM) equipped with a digital correlator (TurboCorr) at 636 nm at a scattering angle of 90°. The hydrodynamic diameter (Dh) was determined by DLS experiments at 25°C.

## 2. Synthesis of ENDT<sub>n</sub>

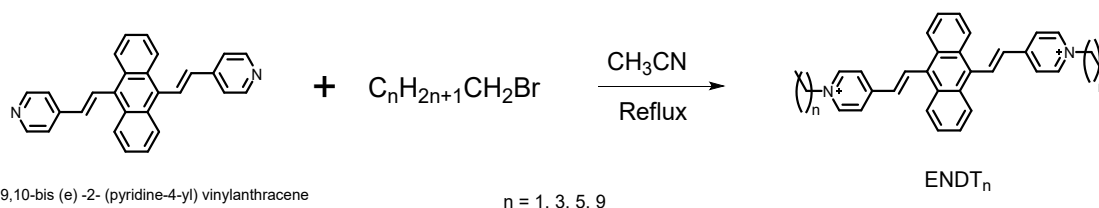

Scheme S1. Synthetic route to  $\text{ENDT}_n$ .

$\text{ENDT}_n$  was prepared successfully by refluxing compound 9,10-bis (e) -2-(pyridine-4-yl) vinylanthracene and bromo-alkanes in MeCN (30 mL). In a typical process, compound 9,10-bis (e) -2-(pyridine-4-yl) vinylanthracene (0.49 g, 1.0 mmol) and excess bromoethane (1.08 g, 10.0 mmol) were added to MeCN (30 mL) and then reflux overnight. After the reaction was finished, the reaction mixture was cold to room temperature,  $\text{ENDT}_1$  was filtered off and washed with MeCN for 3 times. The yield was about 50.3%. Compound  $\text{ENDT}_3$ ,  $\text{ENDT}_5$ ,  $\text{ENDT}_9$  are repeat by this step.

**$\text{ENDT}_1$** : Red solid, 56.7 %; m.p. > 250 °C.  $^1\text{H}$  NMR (400 MHz,  $\text{D}_2\text{O}$ )  $\delta$  (ppm): 8.68(d, 4H), 8.24(d, 2H), 8.10(m, 4H), 8.01(m, 4H), 7.46(m, 4H), 6.90(d, 2H), 4.53(t, 4H), 1.58(m, 6H).  $^{13}\text{C}$  NMR (100 MHz,  $\text{D}_2\text{O}$ )  $\delta$  (ppm): 151.8, 143.2, 136.3, 131.4, 130.5, 128.0, 126.3, 125.2, 124.1, 56.2, 15.6. LRMS spectra of  $\text{ENDT}_1$ . Calcd. For  $\text{C}_{32}\text{H}_{30}\text{N}_2$  ( $[\text{M} - 2\text{Br}]^{2+}$ ): 221.12, found: 221.11. IR(KBr)  $\nu$ : 3432, 3020, 2923, 1610, 1556, 1513, 1466, 1462, 1441, 1377, 1335, 1208, 1161, 1008, 864, 753, 710  $\text{cm}^{-1}$ .

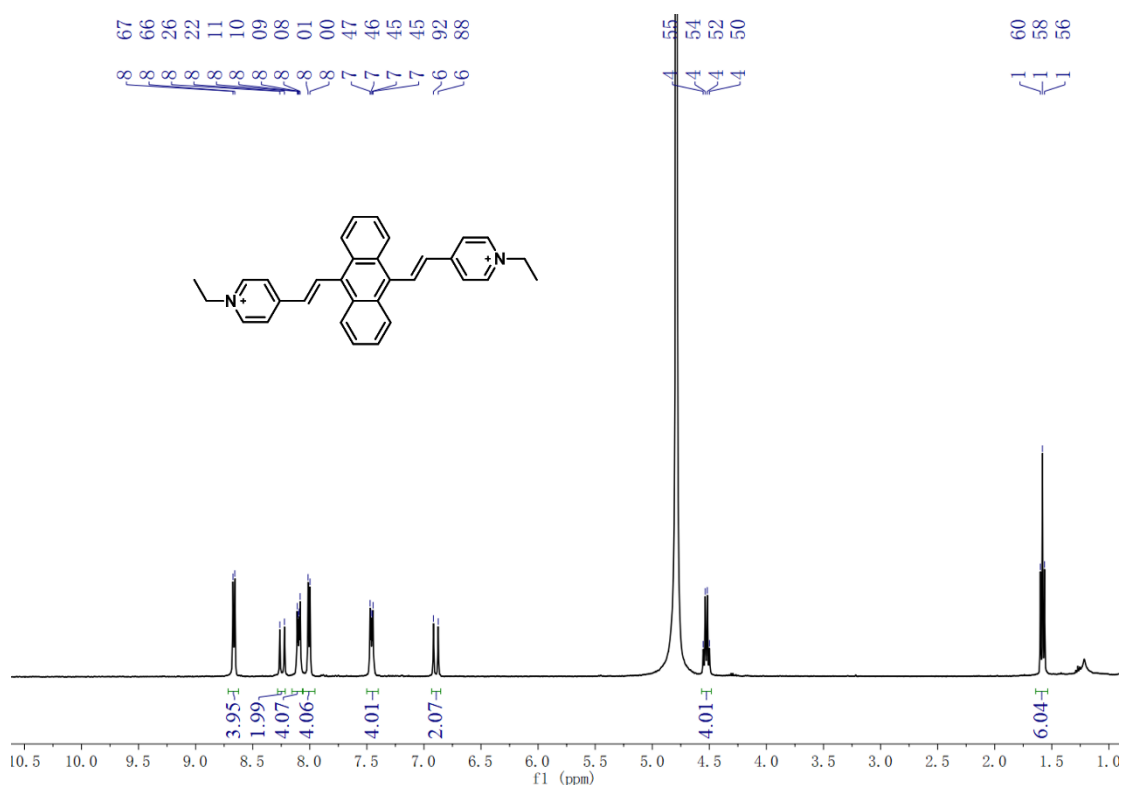

Figure S1:  $^1\text{H}$  NMR spectra (400 MHz, 298 K,  $\text{D}_2\text{O}$ ) of compound  $\text{ENDT}_1$ .

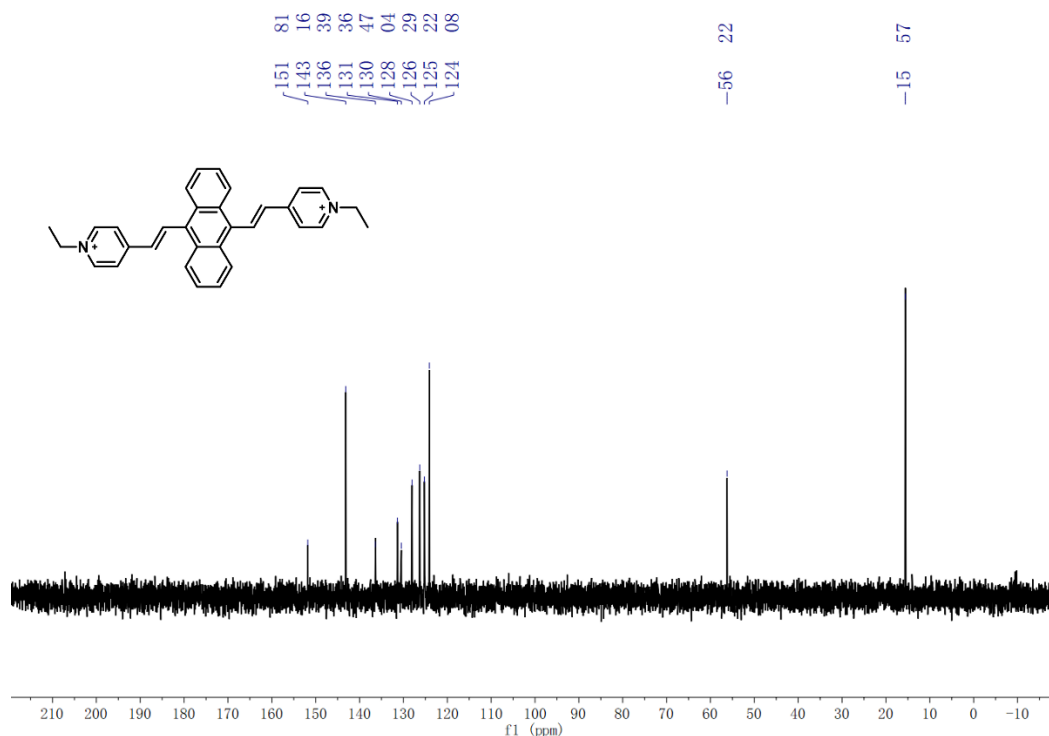

Figure S2.  $^{13}\text{C}$  NMR spectra (100 MHz, 298 K,  $\text{D}_2\text{O}$ ) of compound  $\text{ENDT}_1$ .

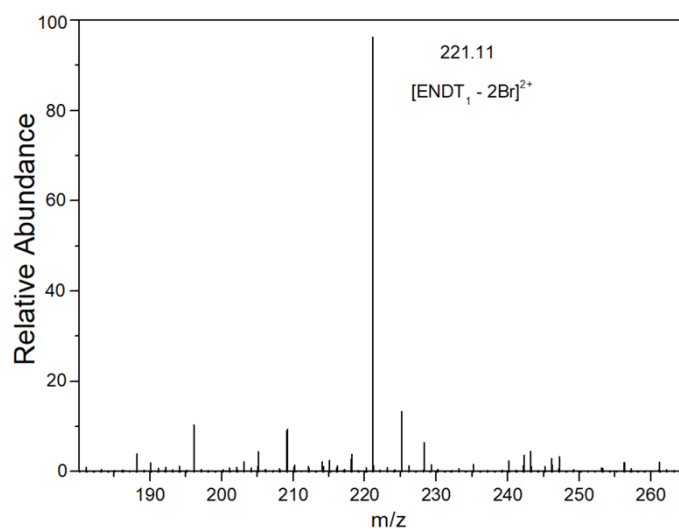

Figure S3. LRMS spectra of  $\text{ENDT}_1$ . Calcd. For  $\text{C}_{32}\text{H}_{30}\text{N}_2$  ( $[\text{M} - 2\text{Br}]^{2+}$ ): 221.12, found: 221.11.

**ENDT<sub>3</sub>**: Red solid, 55 %; m.p. > 250 °C.  $^1\text{H}$  NMR (400 MHz,  $\text{CDCl}_3$ )  $\delta$  (ppm): 8.64 (s, 4H), 8.31 (d,  $J = 8.0$  Hz, 2H), 8.12 (s, 4H), 7.99 (s, 4H), 7.48 (s, 4H), 6.92 (d,  $J = 8.0$  Hz, 2H), 4.47 (s, 4H), 1.93 (s, 4H), 1.31 (m, 4H), 0.90 (d,  $J = 4.0$  Hz, 6H).  $^{13}\text{C}$  NMR (100 MHz,  $\text{CD}_3\text{CN}/\text{DMSO}$ )  $\delta$  (ppm): 152.9, 144.9, 138.5, 133.1, 132.4, 129.4, 126.9, 126.5, 125.2, 60.5, 33.2, 19.2, 13.4. IR(KBr)  $\nu$ : 3464, 3392, 3041, 2963, 2882, 1634, 1604, 1510, 1455, 1379, 1311, 1167, 1094, 988, 844, 755  $\text{cm}^{-1}$ . LRMS spectra of  $\text{ENDT}_3$ . Calcd. For  $\text{C}_{36}\text{H}_{38}\text{N}_2$  ( $[\text{M} - 2\text{Br}]^{2+}$ ): 249.15, found: 249.13.

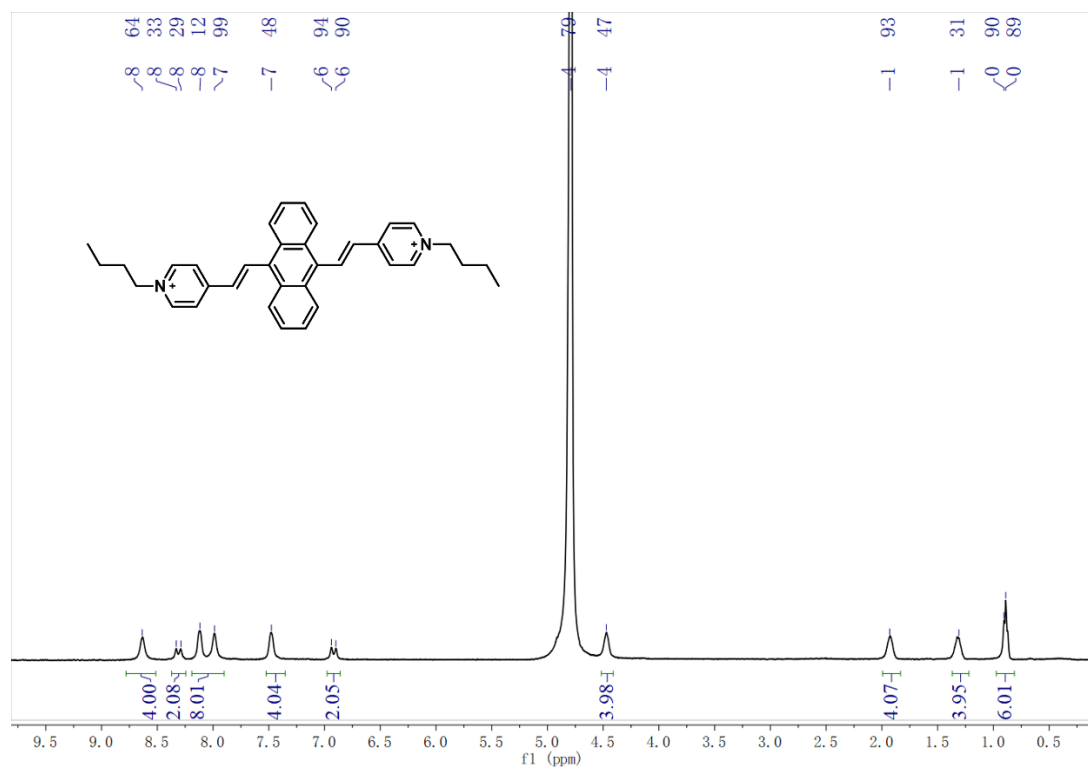

Figure S4. <sup>1</sup>H NMR spectra (400 MHz, 298 K, D<sub>2</sub>O) of compound ENDT<sub>3</sub>.

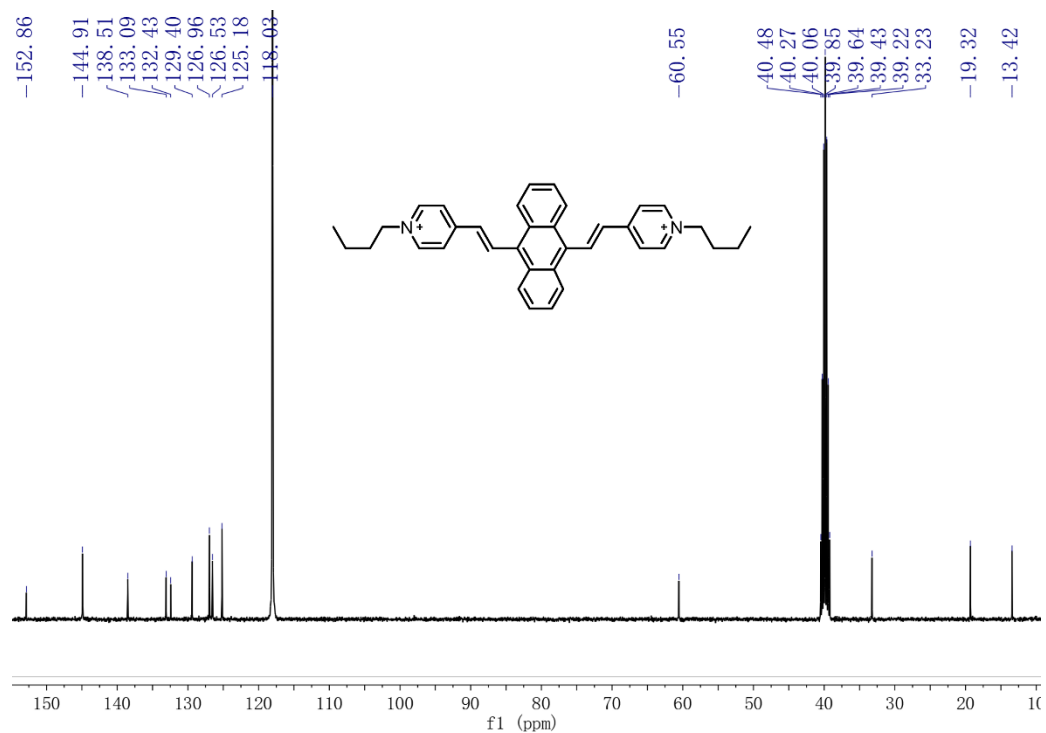

Figure S5. <sup>13</sup>C NMR spectra (100 MHz, 298 K, CD<sub>3</sub>CN/DMSO) of compound ENDT<sub>3</sub>.

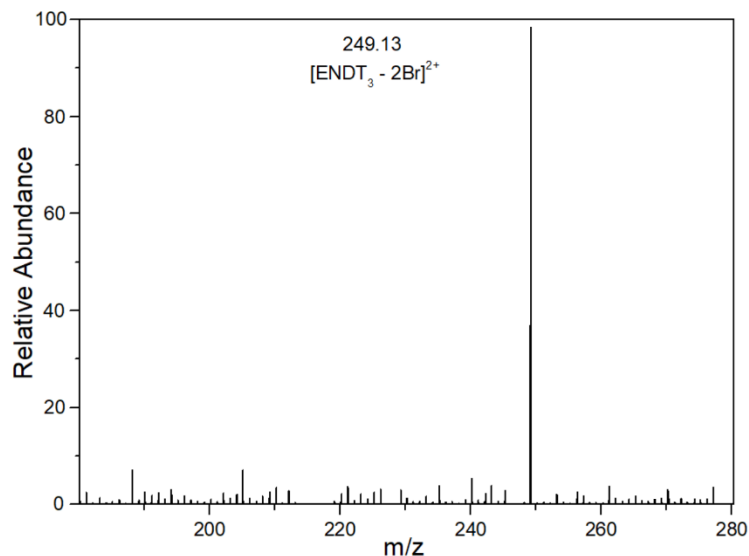

Figure S6. LRMS spectra of ENDT<sub>3</sub>. Calcd. For C<sub>36</sub>H<sub>38</sub>N<sub>2</sub> ([M - 2Br]<sup>2+</sup>): 249.15, found: 249.13.

**ENDT<sub>5</sub>**: Red solid, 52 %; m.p. > 250 °C. <sup>1</sup>H NMR (400 MHz, Acetonitrile-d<sub>3</sub>) δ (ppm): 8.74 (d, *J* = 8.0 Hz, 2H), 8.69 (d, *J* = 4.0 Hz, 4H), 8.41-8.38 (m, 4H), 8.25 (d, *J* = 4.0 Hz, 4H) 7.64-7.61 (m, 4H), 7.23 (d, *J* = 8.0 Hz, 4H), 4.51 (t, *J* = 8.0 Hz, 4H), 2.00 (t, *J* = 8.0 Hz, 4H), 1.36 (s, 12H), 0.91 (t, *J* = 6.0 Hz, 6H). <sup>13</sup>C NMR (100 MHz, Acetonitrile-d<sub>3</sub>) δ (ppm): 153.4, 144.8, 138.8, 133.1, 132.5, 129.7, 127.2, 126.6, 125.4, 118.4, 61.6, 31.3, 25.8, 22.7, 13.8. IR(KBr) ν: 3462, 3385, 3037, 2956, 2927, 2867, 1611, 1508, 1457, 1440, 1258, 1164, 1092, 1015, 858, 799, 743 cm<sup>-1</sup>. LR-MS spectra of ENDT<sub>5</sub>. Calcd. For C<sub>40</sub>H<sub>46</sub>N<sub>2</sub> ([M - 2Br]<sup>2+</sup>): 277.18, found: 277.16.

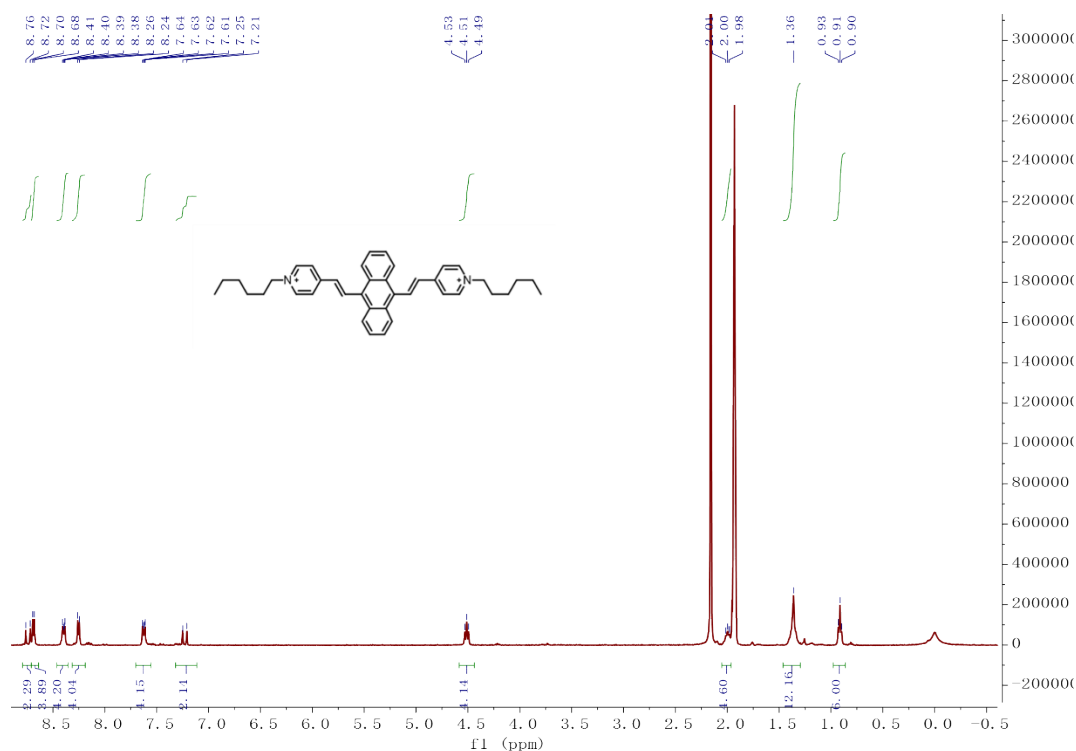

Figure S7.  $^1\text{H}$  NMR spectra (400 MHz, 298 K,  $\text{CD}_3\text{CN}$ ) of compound  $\text{ENDT}_5$ .

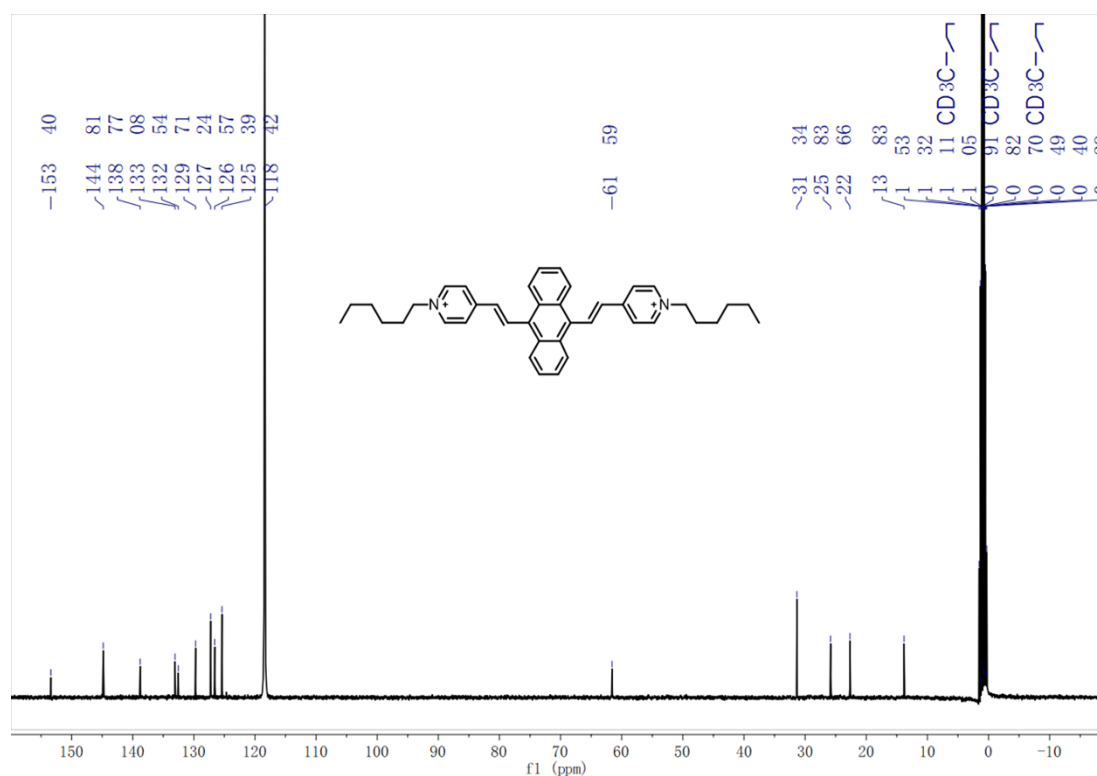

Figure S8.  $^{13}\text{C}$  NMR spectra (100 MHz, 298 K,  $\text{CD}_3\text{CN}$ ) of compound  $\text{ENDT}_5$ .

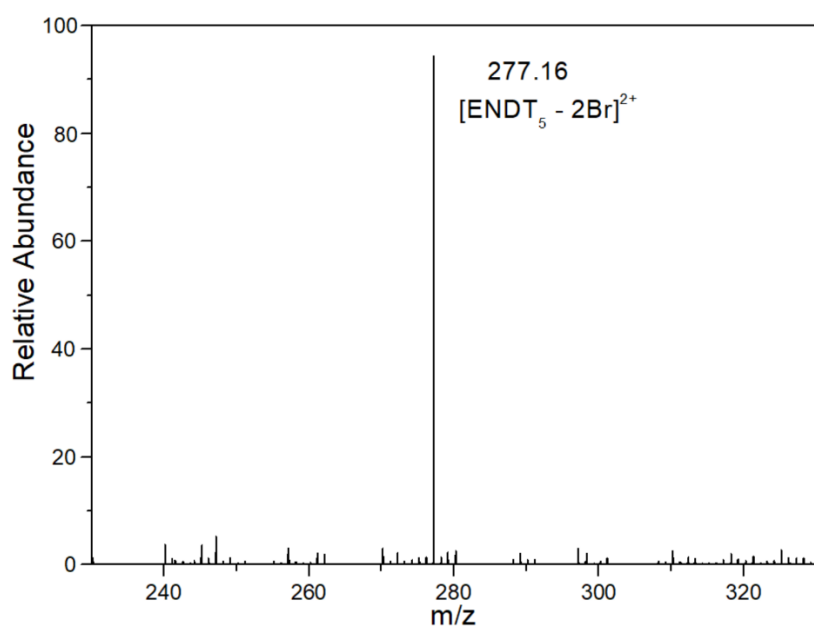

Figure S9. LRMS spectra of  $\text{ENDT}_5$ . Calcd. For  $\text{C}_{40}\text{H}_{46}\text{N}_2$  ( $[\text{M} - 2\text{Br}]^{2+}$ ): 277.18, found: 277.16.

**$\text{ENDT}_9$** : Dark red solid, 49 %; m.p. > 250 °C.  $^1\text{H}$  NMR (400 MHz, Acetonitrile- $d_3$ )  $\delta$  (ppm): 8.78 – 8.74 (m, 4H), 8.37 (d,  $J = 4.0$  Hz, 4H), 8.28 (d,  $J = 8.0$  Hz, 2H), 7.63 (t,  $J = 4.0$  Hz, 2H), 7.52 (s, 6H), 7.22 (d,  $J = 8.0$  Hz, 2H), 4.55 (t,  $J = 8.0$  Hz, 4H), 3.44 (t,



$J = 6.0$  Hz, 4H), 1.39-1.21 (m, 28H), 0.88 (m, 6H).  $^{13}\text{C}$  NMR (100 MHz, Acetonitrile- $d_3$ )  $\delta$  (ppm): 153.4, 144.8, 138.8, 133.1, 132.5, 129.7, 127.2, 126.5, 125.3, 118.5, 61.6, 33.3, 32.1, 31.3, 29.6, 29.1, 26.1, 22.9, 19.5, 13.9, 13.3. IR(KBr)  $\nu$ : 3440, 3024, 2914, 2846, 1606, 1513, 1457, 1376, 1321, 1164, 1101, 981, 846, 757  $\text{cm}^{-1}$ . LRMS spectra of  $\text{ENDT}_9$ . Calcd. For  $\text{C}_{48}\text{H}_{62}\text{N}_2$  ( $[\text{M} - 2\text{Br}]^{2+}$ ): 333.24, found: 333.28.

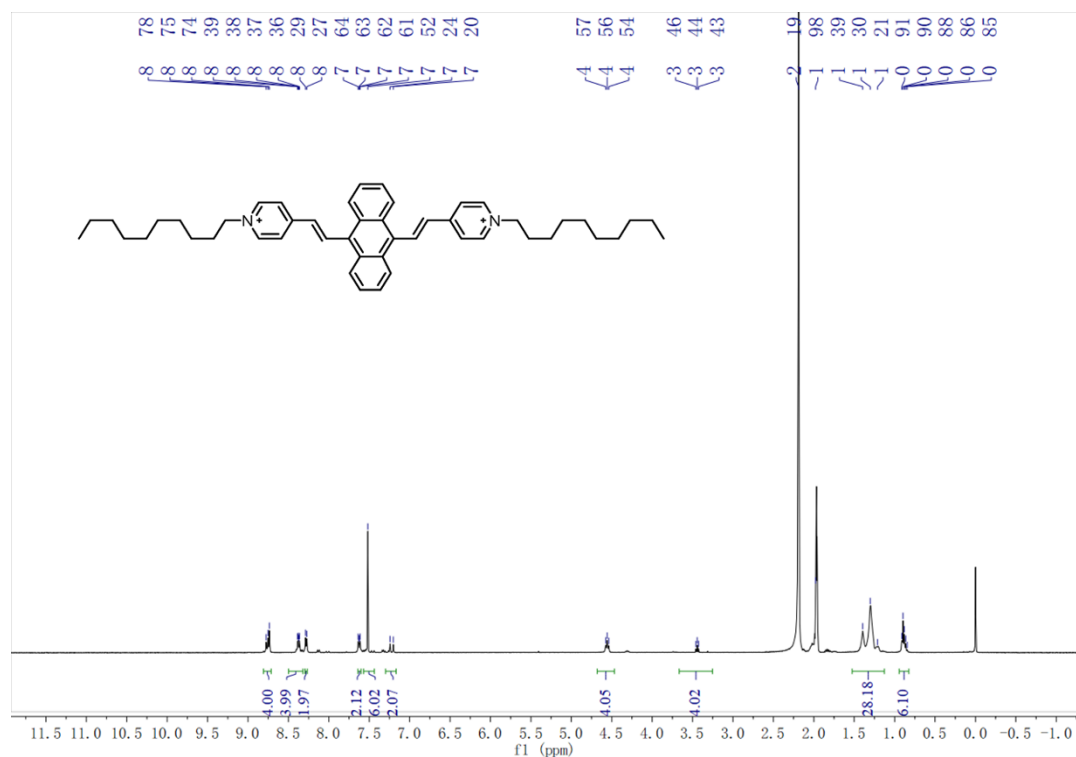

Figure S10.  $^1\text{H}$  NMR spectra (400 MHz, 298 K,  $\text{CD}_3\text{CN}$ ) of compound  $\text{ENDT}_9$ .

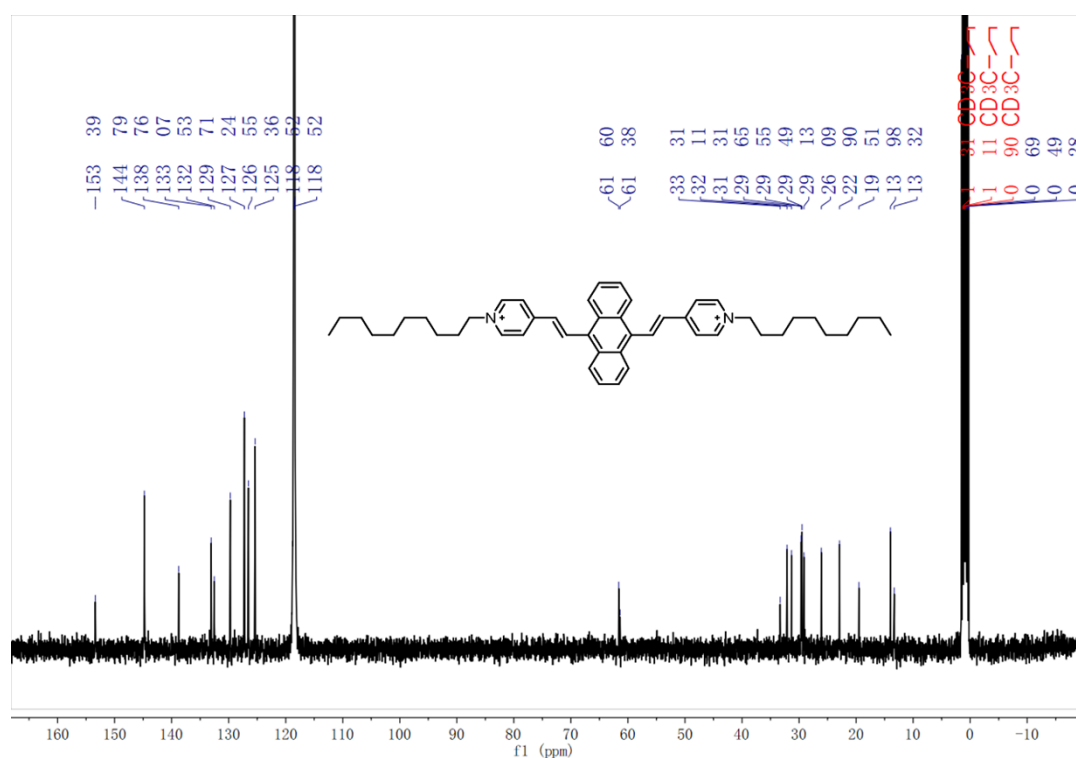

Figure S11.  $^{13}\text{C}$  NMR spectra (100 MHz, 298 K,  $\text{CD}_3\text{CN}$ ) of compound  $\text{ENDT}_9$ .

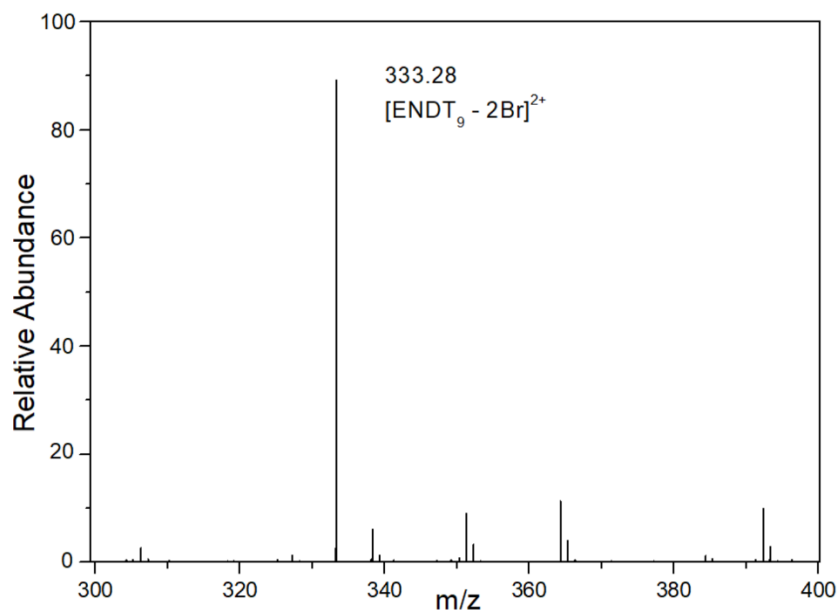

Figure S12. LRMS spectra of  $\text{ENDT}_9$ . Calcd. For  $\text{C}_{48}\text{H}_{62}\text{N}_2$  ( $[\text{M} - 2\text{Br}]^{2+}$ ): 333.24, found: 333.28.

### 3. Synthesis of **WP5**

**WP5** was prepared according to previous report,<sup>S1,S2</sup> and the  $^1\text{H}$  NMR was showed in Figure S13.

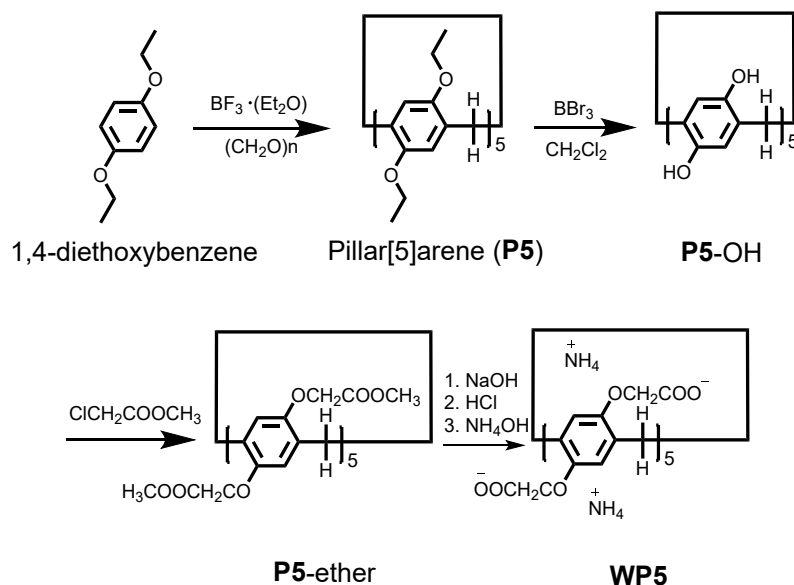

Scheme S2. Synthesis of water soluble pillar[5]arene (**WP5**).

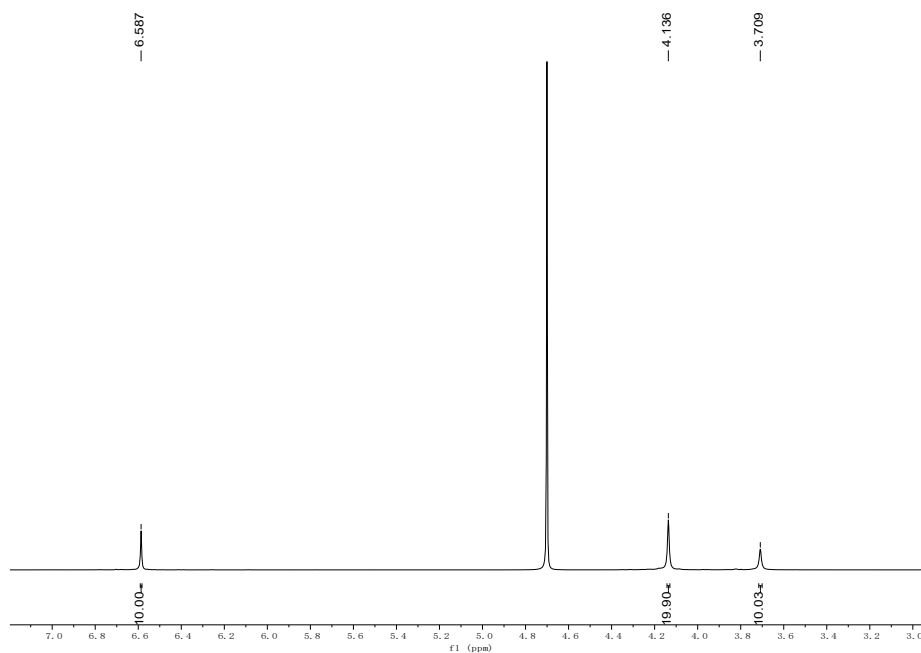

Figure S13.  $^1\text{H}$ NMR (400 MHz, 298K,  $\text{D}_2\text{O}$ ) spectrum of **WP5**.

#### 4. Host-guest interaction between **WP5** and **ENDT<sub>n</sub>**

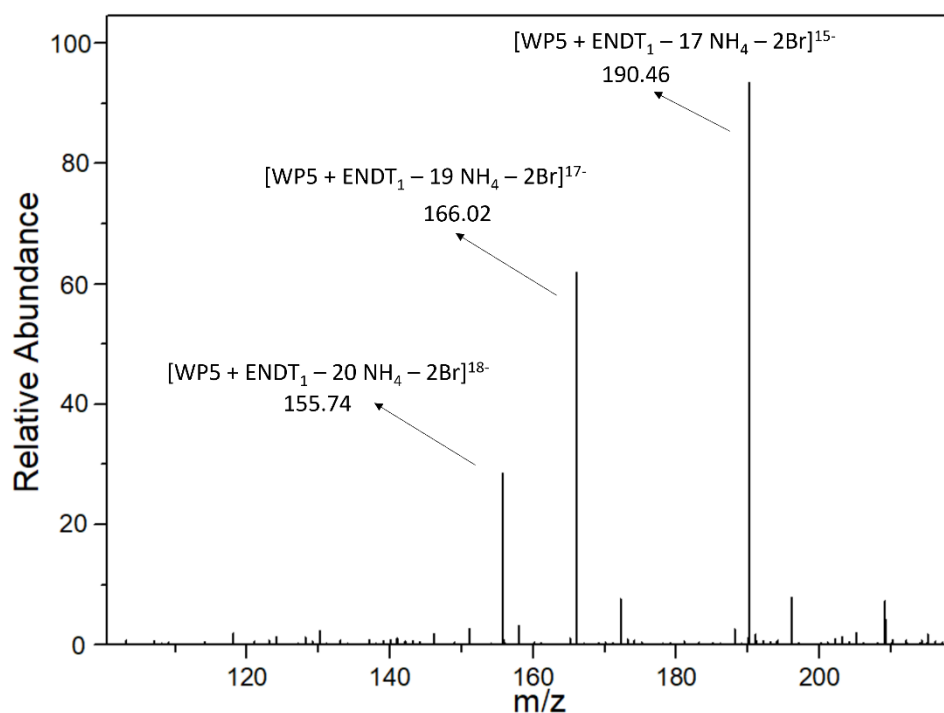

Figure S14. LR-ESI-MS spectra of  $(\text{WP5})_2 \supset \text{ENDT}_1$ . Calcd. For  $\text{C}_{142}\text{H}_{110}\text{N}_2\text{O}_6\text{O}$  ( $[\text{2WP5} + \text{ENDT}_1 - 20\text{NH}_4 - 2\text{Br}]^{18-}$ ): 155.75, found: 155.74;  $\text{C}_{142}\text{H}_{114}\text{N}_3\text{O}_6\text{O}$  ( $[\text{2WP5} + \text{ENDT}_1 - 19\text{NH}_4 - 2\text{Br}]^{17-}$ ): 165.98, found: 166.02;  $\text{C}_{142}\text{H}_{122}\text{N}_5\text{O}_6\text{O}$  ( $[\text{2WP5} + \text{ENDT}_1 - 17\text{NH}_4 - 2\text{Br}]^{15-}$ ): 190.51, found: 190.46.

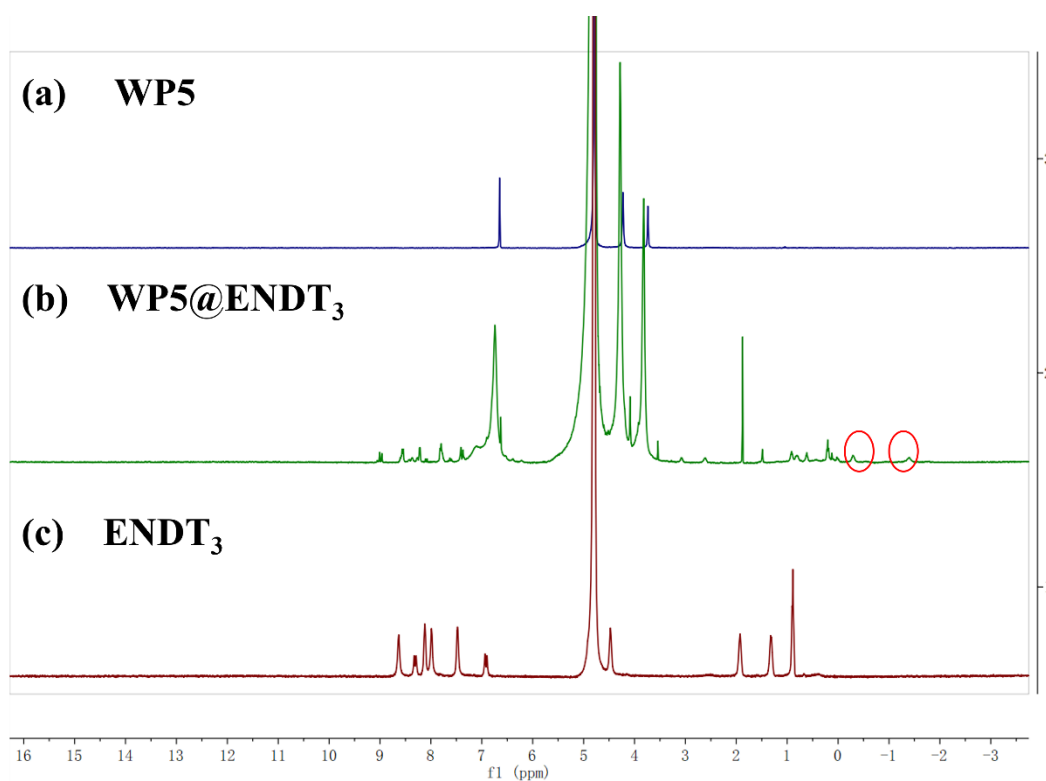

Figure S15.  $^1\text{H}$  NMR spectra (400 MHz,  $\text{D}_2\text{O}$ , 298 K) of (a)  $\text{ENDT}_3$  (5.0 mM), (b)  $\text{ENDT}_3 + \text{WP5}$  ( $[\text{ENDT}_3] = 5.0$  mM,  $[\text{WP5}] = 10.0$  mM), and (c)  $\text{ENDT}_3$  (10.0 mM).

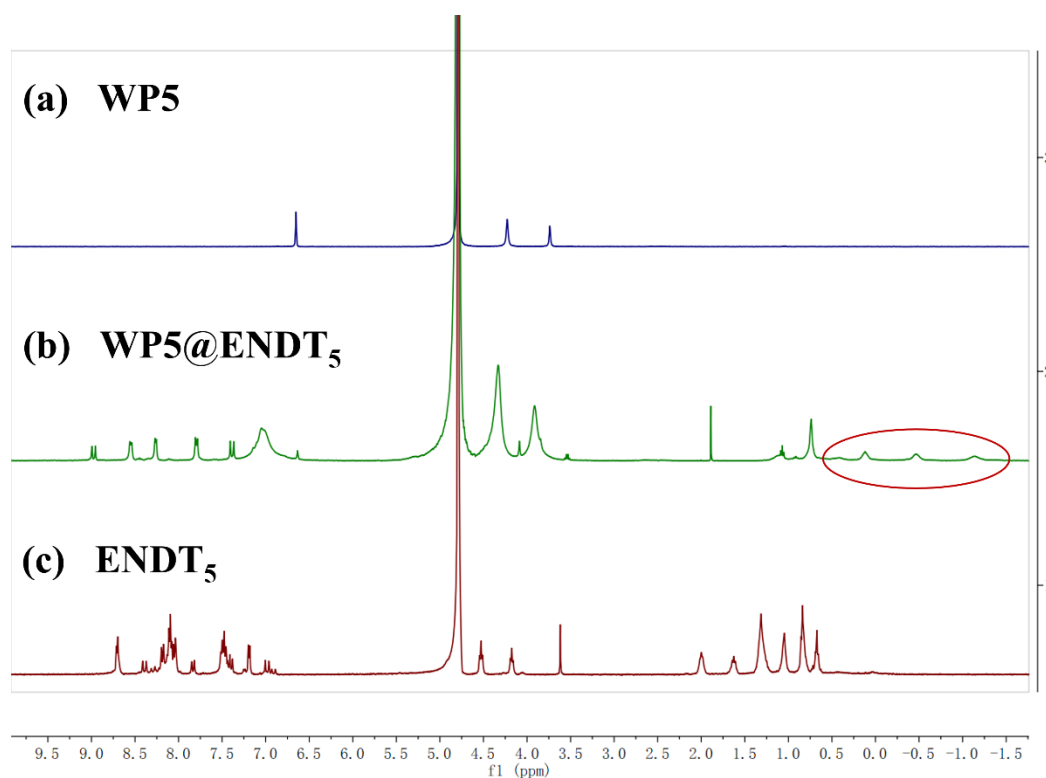

Figure S16.  $^1\text{H}$  NMR spectra (400 MHz,  $\text{D}_2\text{O}$ , 298 K) of (a)  $\text{ENDT}_5$  (5.0 mM), (b)  $\text{ENDT}_5 + \text{WP5}$  ( $[\text{ENDT}_5] = 5.0$  mM,  $[\text{WP5}] = 10.0$  mM), and (c)  $\text{ENDT}_5$  (10.0 mM).

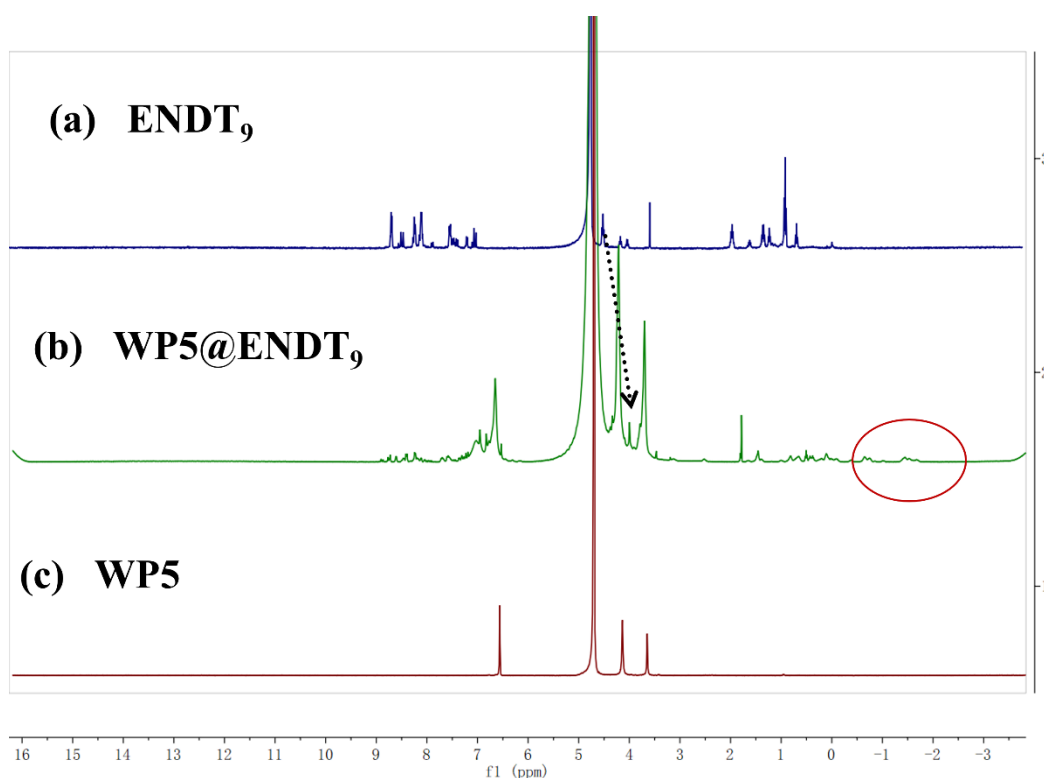

Figure S17.  $^1\text{H}$  NMR spectra (400 MHz,  $\text{D}_2\text{O}$ , 298 K) of (a)  $\text{ENDT}_9$  (5.0 mM), (b)  $\text{ENDT}_9$  + WP5 ( $[\text{ENDT}_9] = 5.0$  mM,  $[\text{WP5}] = 10.0$  mM), and (c)  $\text{ENDT}_9$  (10.0 mM).

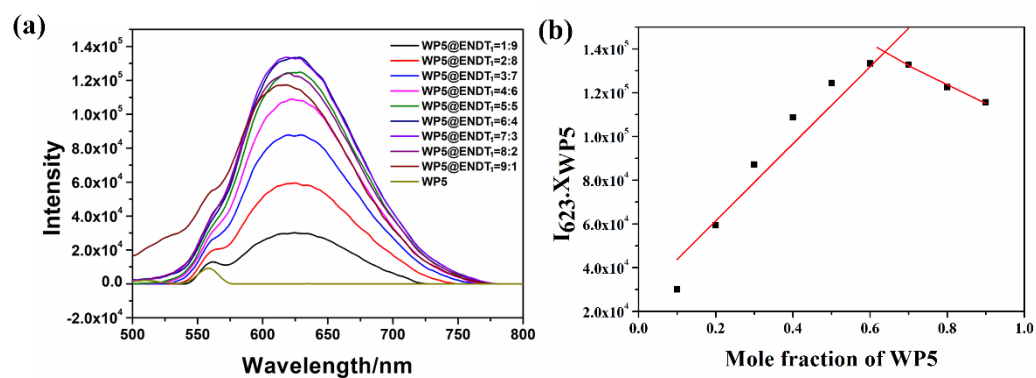

Figure S18. (a) Fluorescence titration of  $\text{ENDT}_1$  (10  $\mu\text{M}$ ) with different concentration of WP5. (b) Job's plot for  $\text{ENDT}_1$  upon addition of WP5 in aqueous medium ( $[\text{ENDT}_1] + [\text{WP5}] = 10$   $\mu\text{M}$ ).

## 5. Self-assembly properties

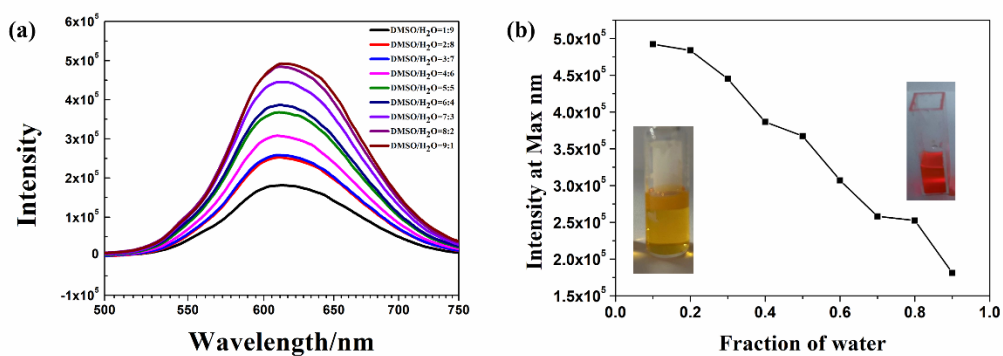

Figure S19. (a) Fluorescence emission of  $\text{ENDT}_1$  (10  $\mu\text{mol/L}$ ) in different ratio of  $\text{H}_2\text{O}/\text{DMSO}$  mixture. (b) Fluorescence emission of  $\text{ENDT}_1$  (10  $\mu\text{mol/L}$ ) in Max ratio of  $\text{H}_2\text{O}/\text{DMSO}$  mixture.

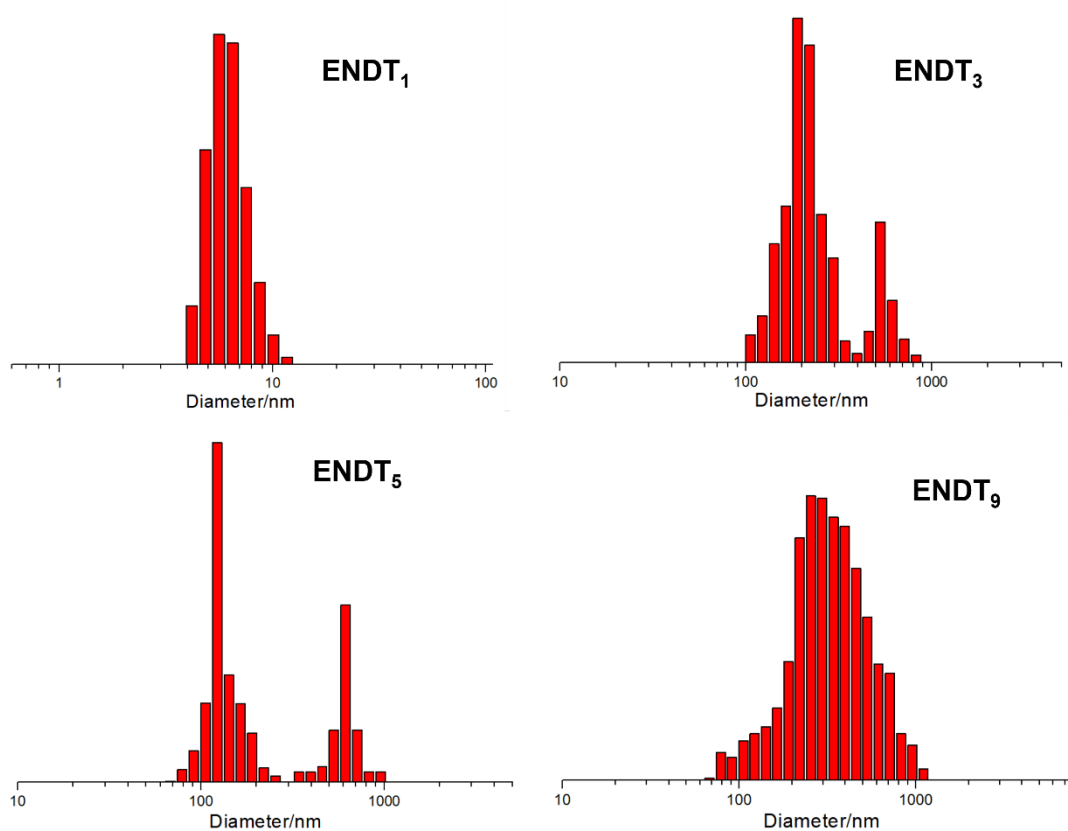

Figure S20. DLS data of  $\text{ENDT}_n$  (10  $\mu\text{mol/L}$ ) in water.

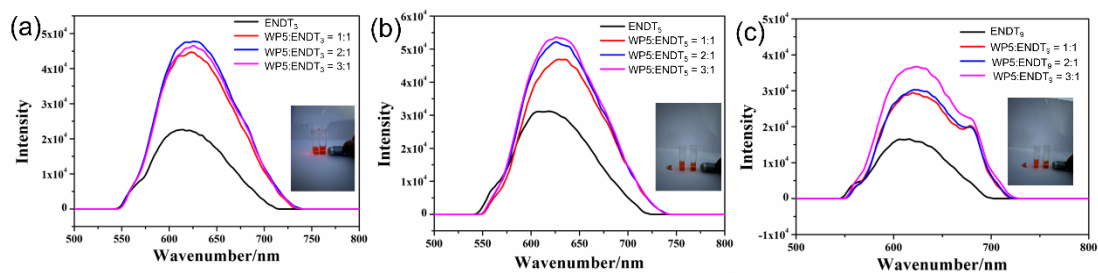

Figure S21. (a-c) Fluorescence titration of ENDT<sub>3</sub>, ENDT<sub>5</sub>, ENDT<sub>9</sub> (10 μM) with different concentration of WP5.  $\lambda_{\text{ex}} = 470 \text{ nm}$ . Insert: Trndall of ENDT<sub>3</sub>, ENDT<sub>5</sub>, ENDT<sub>9</sub> and WP5@ENDT<sub>3</sub>, WP5@ENDT<sub>5</sub>, WP5@ENDT<sub>9</sub>.

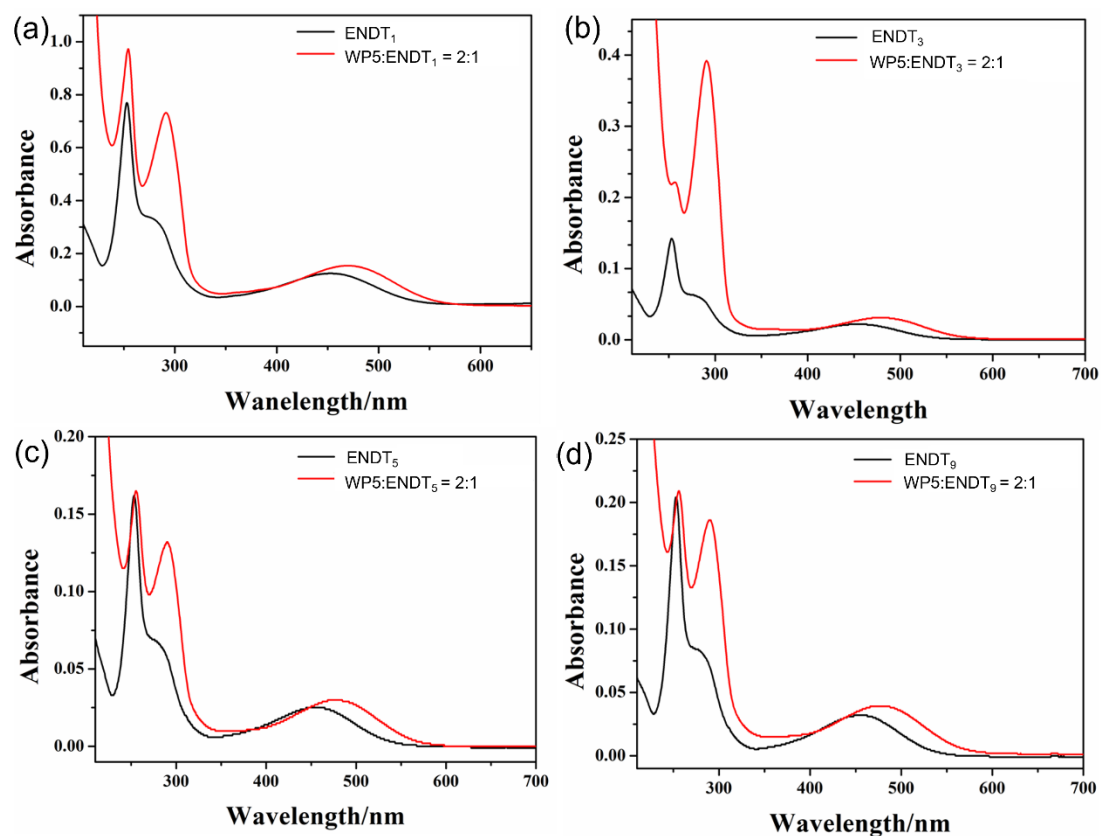

Figure S22. (a-d) UV-vis absorption spectra of ENDT-(1,3,5,9) and (WP5)<sub>2</sub>@ENDT-(1,3,5,9). [ENDT-(1,3,5,9) = 10 μmol/L, WP5 = 20 μmol/L].

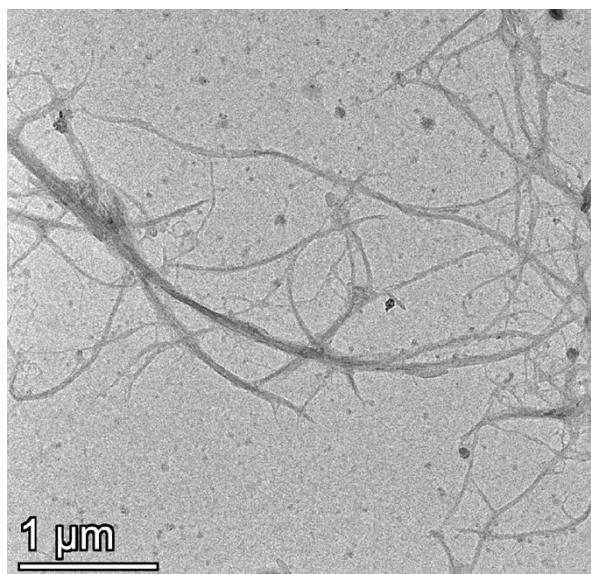

Figure S23. TEM image of ENDT<sub>9</sub> based assemblies in water.

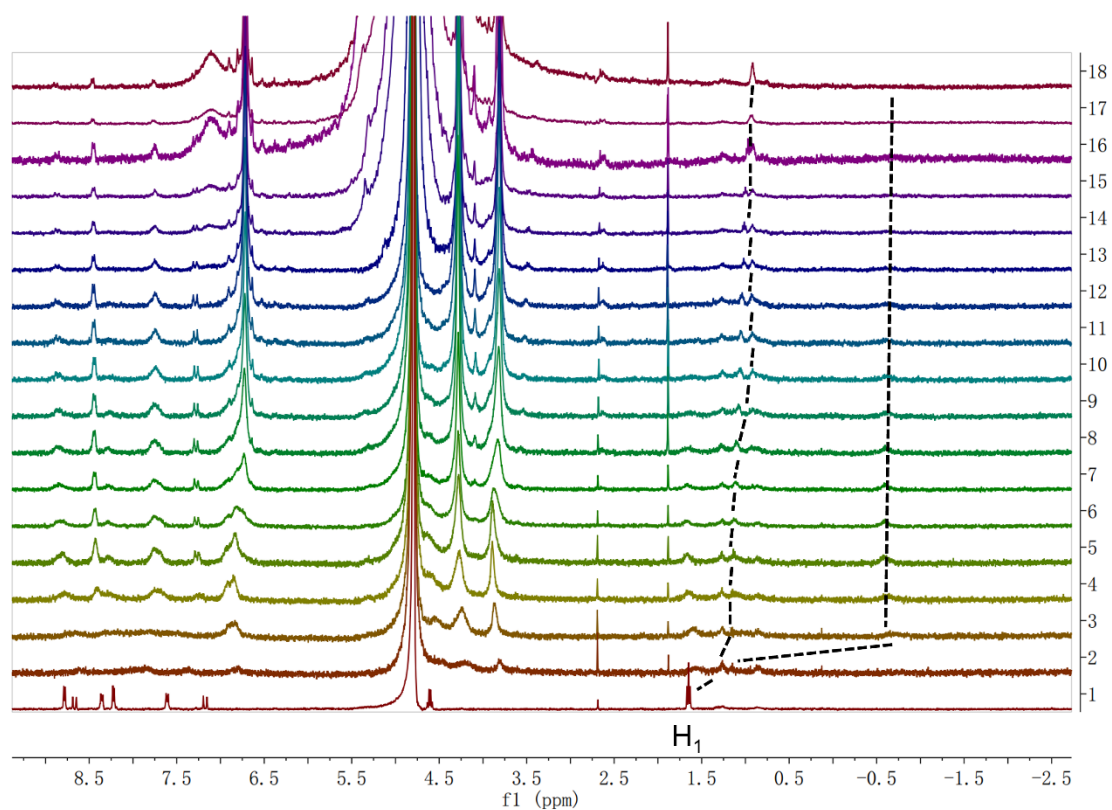

Fig. S24. <sup>1</sup>H NMR spectra (400 MHz, D<sub>2</sub>O, 298 K) of ENDT<sub>1</sub> at a concentration of 1.00 mM upon addition of various concentrations of the molecular WP5: (1) 0 mM, (2) 0.196 mM, (3) 0.385 mM, (4) 0.566 mM, (5) 0.741 mM, (6) 0.909 mM, (7) 1.228 mM, (8) 1.525 mM, (9) 1.803 mM, (10) 2.063mM, (11) 2.308 mM, (12) 2.537 mM, (13) 2.754 mM, (14) 2.966 mM, (15) 3.151 mM, (16) 3.590 mM, (17) 3.976 mM and (18) 4.318 mM.



The non-linear curve-fitting was based on a previous report.<sup>S3</sup>

$$\Delta\delta = (\Delta\delta_\infty / [G]_0) (0.5[H]_0 + 0.5([G]_0 + 1/K_a) - (0.5 ([H]_0^2 + (2[H]_0 (1/K_a - [G]_0)) + (1/K_a + [G]_0)^2)^{0.5})) \dots\dots\dots(\text{Eq. S1})$$

where  $\Delta\delta$  is the chemical shift change of H<sub>1</sub> on ENDT<sub>1</sub>,  $\Delta\delta_\infty$  is the chemical shift change of H<sub>1</sub> when ENDT<sub>1</sub> is completely complexed, [H]<sub>0</sub> is the initial concentration of the WP5, and [G]<sub>0</sub> is the fixed initial concentration of ENDT<sub>1</sub>.

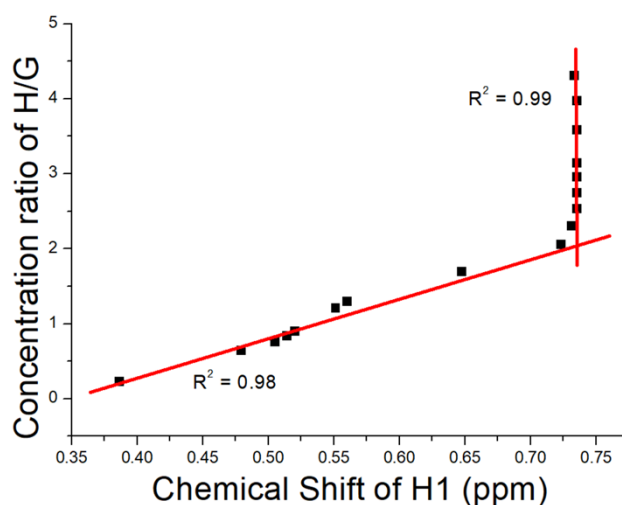

Fig. S25 Mole ratio plot for **WP5** and ENDT<sub>1</sub>, indicating a 2 : 1 stoichiometry.

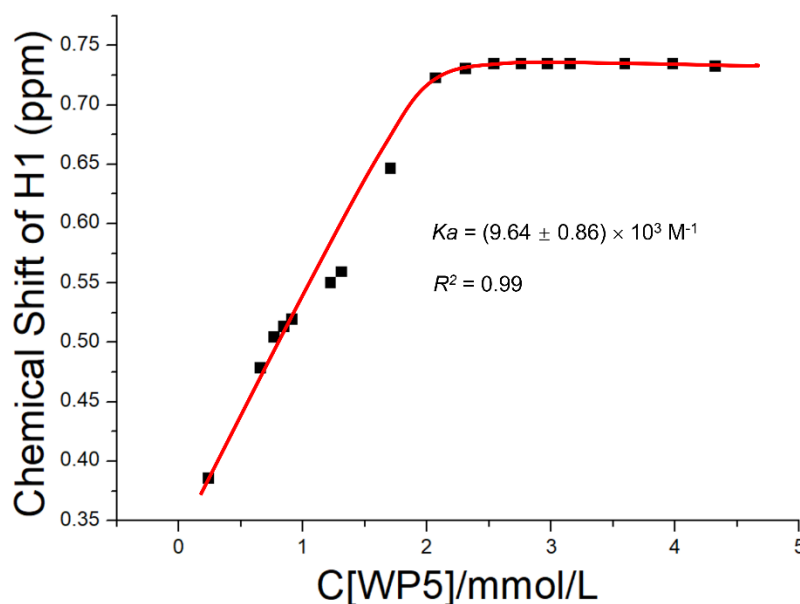

Fig. S26. The chemical shift changes of H<sub>1</sub> on ENDT<sub>1</sub> upon addition of **WP5**. The red solid line was obtained from the non-linear curve-fitting.

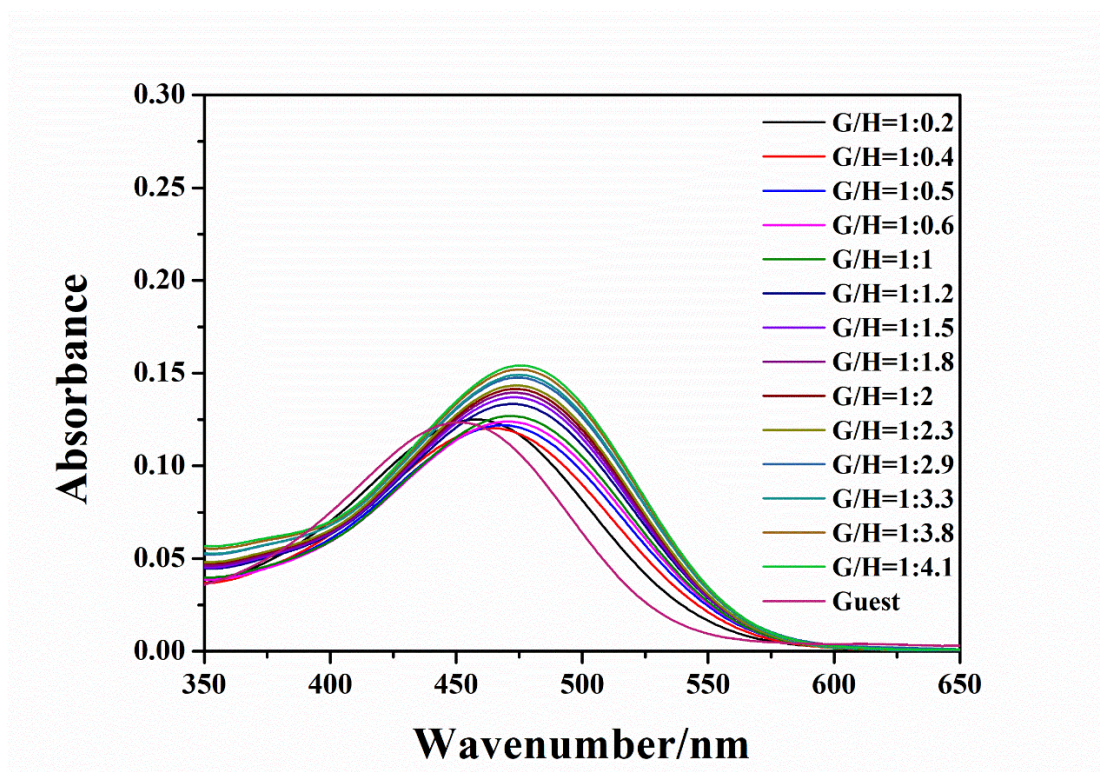

Fig. S27 UV-Vis titration of ENDT (10  $\mu\text{m}$ ) upon addition of WP5.

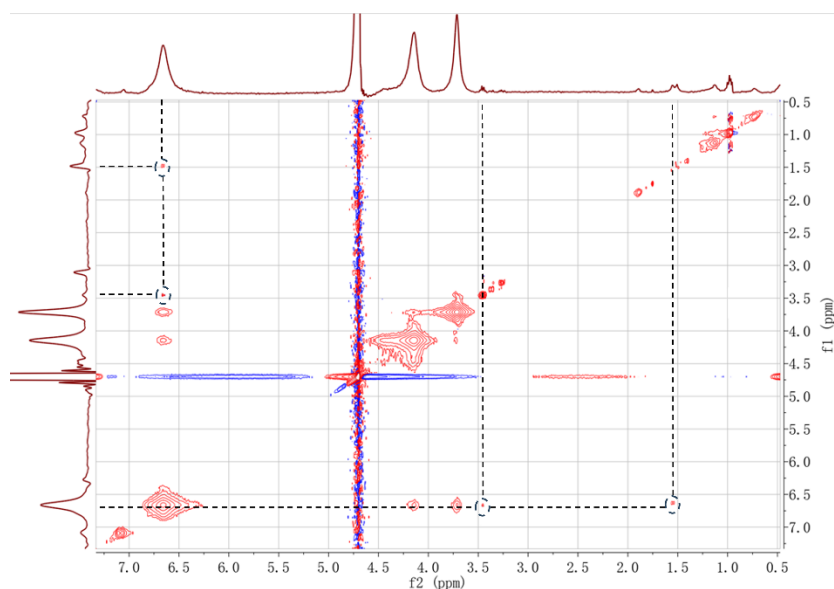

Fig. S28. 2D NOE NMR spectrum (400 MHz,  $\text{D}_2\text{O}$ , 298 K) of  $(\text{WP5})_2 \gg \text{ENDT}_1$  at 1.0 mM.

## 6. References

S1. Tomoki Ogoshi, Masayoshi Hashizume, Tada-aki Yamagishi and Yoshiaki

Nakamoto, *Chem. Commun.*, **2010**, *46*, 3708-3710.

S2. Yue Zhang, Yang Wang, Tingting Chen, Ying Han, Chaoguo Yan, Jin Wang, Bing Lu, Longtao Ma, Yue Ding, and Yong Yao, *Chem. Commun.*, **2023**, *59*, 8266-8269.

S3. P. R. Ashton, R. Ballardini, V. Balzani, M. Bělohradský, M. T. Gandolfi, D. Philp, L. Prodi, F. M. Raymo, M. V. Reddington, N. Spencer, J. F. Stoddart, M. Venturi, D. J. Williams. *J. Am. Chem. Soc.* **1996**, *118*, 4931–4951.
